# Supplementary material
Source: Elsevier journal article supplement (https://www.sciencedirect.com/science/article/pii/S188558571500167X)
Supplement: mmc1 [file S188558571500167X:mmc1.pdf]

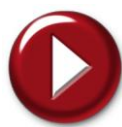

**Supplementary material**

---

## **Short-term Heparin Re-exposure During Heart Transplantation in Patients With Ventricular Assist Devices and Acute Heparin-Induced Thrombocytopenia**

Ana Ezponda,<sup>a</sup> Ana Alfonso,<sup>b</sup> María Josefa Iribarren,<sup>c</sup> Gregorio Rábago,<sup>d</sup> José Antonio Páramo,<sup>a,b</sup> and Ramón Lecumberri<sup>a,b,\*</sup>

<sup>a</sup>*Facultad de Medicina, Universidad de Navarra, Pamplona, Navarra, Spain*

<sup>b</sup>*Servicio de Hematología, Clínica Universidad de Navarra, Pamplona, Navarra, Spain*

<sup>c</sup>*Departamento de Anestesiología, Clínica Universidad de Navarra, Pamplona, Navarra, Spain*

<sup>d</sup>*Departamento de Cardiología y Cirugía Cardiovascular, Clínica Universidad de Navarra, Pamplona, Navarra, Spain*

---

### **Descripción detallada de los pacientes**

#### ***Caso 1***

Mujer de 62 años de edad que sufrió un infarto de miocardio masivo y *shock* cardiogénico a pesar de implantársele un balón de contrapulsación intraaórtico. Al diagnóstico inició tratamiento anticoagulante con heparina no fraccionada (HNF); 8 días después, se procedió a la colocación de asistencia ventricular (AV) izquierda (Levitronix Centrimag); 2 días después del inicio de la asistencia, el recuento plaquetario cayó hasta 15.000/ $\mu$ l, sin signos ni síntomas hemorrágicos ni nuevos episodios trombóticos. La probabilidad clínica pretest de trombocitopenia inducida por heparina (TIH) (escala de las 4T) fue moderada (4 puntos). La detección de anticuerpos contra el complejo HNF/FP4 mediante inmunoanálisis de gel de partículas (PaGIA, DiaMed-AG; Suiza) resultó positiva. Inmediatamente se sustituyó la anticoagulación con HNF por lepirudina, y en los siguientes días se observó una progresiva

recuperación de la cifra de plaquetas. La paciente experimentó una mejoría de su situación clínica y, 18 días después del diagnóstico de TIH, se ofertó un corazón compatible para trasplante. En ese momento la cifra de plaquetas era 161.000/ $\mu$ l, pero la determinación de anticuerpos anti-HNF/F4 plaquetario (FP4) persistía positiva. La perfusión de lepirudina se interrumpió 2 h antes del inicio del trasplante y exclusivamente durante el periodo de bomba de circulación extracorpórea se empleó HNF según el protocolo habitual. La intervención transcurrió sin incidencias, y una vez asegurada una correcta hemostasia, se inició tratamiento con fondaparinux subcutáneo a dosis de 2,5 mg diariamente (dosis profilácticas). El postoperatorio inicial transcurrió sin complicaciones, sin que la paciente mostrara ningún signo de recurrencia de la TIH. Sin embargo, en el día +8 postrasplante, la paciente presentó un deterioro neurológico súbito debido a una hemorragia cerebral espontánea, de evolución fatal. En el momento de la hemorragia, el recuento plaquetario era totalmente normal, así como las pruebas de coagulación y la función renal. El deterioro neurológico se inició 18 h después de la administración de la última dosis de fondaparinux.

## **Caso 2**

Varón de 55 años diagnosticado de síndrome coronario agudo tratado inicialmente con implante de *stents* en coronaria descendente anterior y diagonal. Siete días después, sufrió oclusión de los *stents*, que obligó a nueva inserción de *stents* y balón de contapulsación intraaórtico, pero el paciente sufrió un *shock* cardiogénico. Al día siguiente se inició AV bilateral (Levitronix Centrimag), continuando anticoagulación con HNF. En las analíticas realizadas posteriormente, se observa una disminución del recuento plaquetario, que alcanzó 36.000/ $\mu$ l 2 días después de la colocación de la AV (10 días desde el inicio de tratamiento con HNF). La probabilidad clínica pretest de TIH fue moderada (5 puntos en la escala de las 4T), por lo que se realizó determinación de anticuerpos anti-HNF/FP4 mediante PaGIA, con resultado positivo. Se sustituyó el tratamiento con HNF por lepirudina, con recuperación progresiva del recuento plaquetario en los días sucesivos. En ningún momento presentó nuevas complicaciones tromboembólicas. Se incluyó al paciente en lista de trasplante, que se realizó a los 21 días del diagnóstico de la TIH, con recuento plaquetario de 170.000/ $\mu$ l y persistencia de positividad de la determinación de anticuerpos anti-HNF/FP4. La perfusión endovenosa de lepirudina se interrumpió 2 h antes de la cirugía, empleando HNF exclusivamente durante el trasplante cardiaco. La intervención y el postoperatorio inicial transcurrieron sin incidencias, y se inició tratamiento postoperatorio con fondaparinux

subcutáneo 2,5 mg/día durante 7 días. No se observó ningún signo de TIH recurrente durante el seguimiento. El paciente continuaba vivo 50 meses después del trasplante.

### **Caso 3**

Varón de 48 años diagnosticado de miocardiopatía dilatada con insuficiencia cardíaca y renal terminales, secundarias a enfermedad mitocondrial. Requirió ingreso e inicio de técnica de hemofiltración continua, y 3 días más tarde, implante de AV bilateral (Levitronix Centrimag). Cinco días después la cifra de plaquetas descendió hasta 25.000/ $\mu$ l, sin otras anomalías asociadas. La probabilidad clínica pretest de TIH era moderada (5 puntos), por lo que se realizó la determinación de anticuerpos anti-HNF/FP4 mediante PaGIA, con resultado positivo. Se inició tratamiento anticoagulante alternativo a la heparina con bivalirudina. Nuevamente, el paciente mostró normalización progresiva del recuento plaquetario periférico. Diez días después del implante de AV (anticuerpos positivos y plaquetas en 116.000/ $\mu$ l), se realizó un doble trasplante cardíaco y renal, empleando HNF exclusivamente durante la circulación extracorpórea. Tras la cirugía, una vez asegurada la adecuada hemostasia, se reinició tratamiento anticoagulante alternativo con argatrobán. Este tratamiento se mantuvo durante 8 días, y luego se sustituyó por fondaparinux 2,5 mg/día como profilaxis contra tromboembolia venosa hasta el momento del alta hospitalaria. El paciente se encontraba vivo y con buen estado general 24 meses después del trasplante.

### **Caso 4**

Mujer de 62 años que sufrió *shock* cardiogénico tras un síndrome coronario agudo, que requirió AV bilateral. Trece días después, la cifra de plaquetas era 36.000/ $\mu$ l. No se identificaron otras causas de la trombocitopenia distintas de una posible TIH, resultando una probabilidad clínica pretest moderada (5 puntos). La determinación de anticuerpos anti-HNF/FP4 mediante PaGIA resultó claramente positiva. La anticoagulación con HNF iniciada al mismo tiempo que la AV se sustituyó por argatrobán. Debido a la detección de material fibrinoide depositado en la pared de una de las cánulas de la asistencia, sin repercusión clínica, se añadió ácido acetilsalicílico 100 mg/día a los 16 días del diagnóstico de TIH. En el día +32 tras el inicio de la AV, se dispuso de un donante apropiado y se procedió al trasplante 2 h después de interrumpir la anticoagulación con argatrobán. Al igual que en los casos anteriores, durante el periodo de circulación extracorpórea se empleó HNF. Lamentablemente, desde el mismo momento del implante se apreció insuficiencia derecha grave del órgano trasplantado, que obligó en el mismo acto quirúrgico a la colocación de una nueva AV con oxigenador de

membrana extracorpóreo. Esta colocación de la nueva AV se complicó con una hemorragia masiva (el recuento plaquetario, que se había mantenido estable durante el trasplante inicial, sufrió un importante descenso debido a la coagulopatía de consumo), que requirió politransfusión y administración de concentrado de complejo protrombínico. Tres días más tarde, se reinició el tratamiento anticoagulante con argatrobán. La condición clínica de la paciente mejoró al principio, con recuentos de plaquetas periféricos de 40.000-50.000/ $\mu$ l, justificados por múltiples causas, como el propio oxigenador de membrana extracorpóreo, necesidad de hemofiltración e infección activa. En ningún momento presentó complicaciones trombóticas durante el seguimiento. La paciente falleció en el día +27 postrasplante debido a candidemia sistémica, mientras esperaba la realización de un segundo trasplante cardiaco.
